# Supplementary material
Source: MDPI journal article supplement (https://www.mdpi.com/2072-4292/11/3/362)

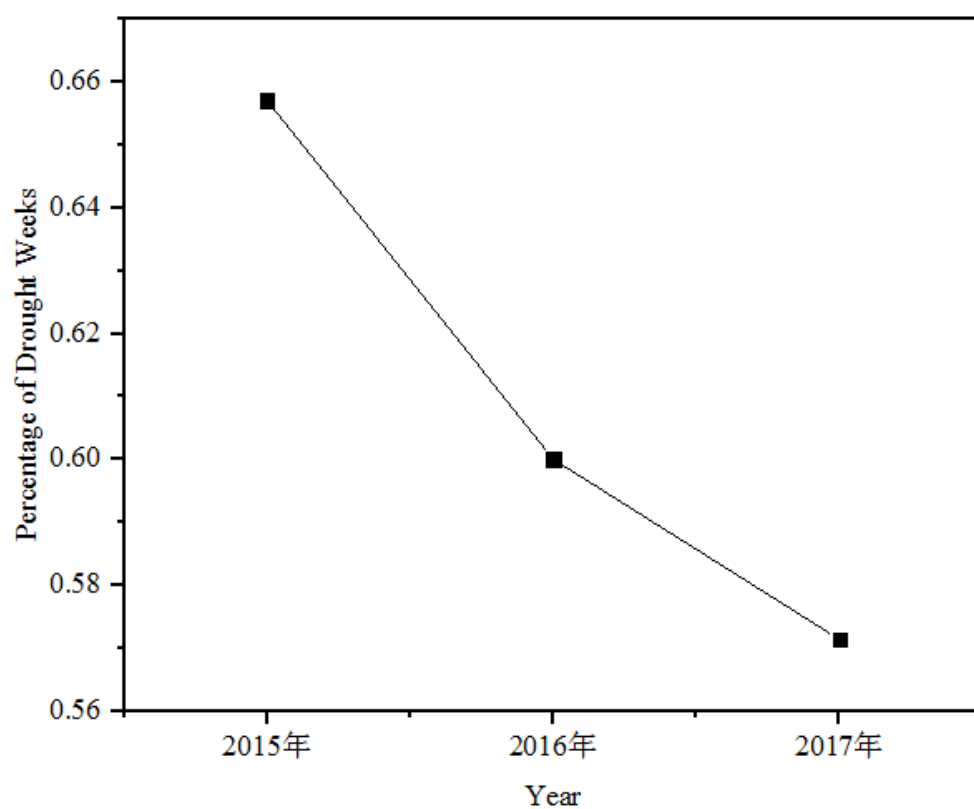

**Figure S1.** The PDW of 2015, 2016 and 2017.

Supplement: s1 [file s1]
